# Supplementary material
Source: HighWire-hosted journal article supplement (https://www.cmajopen.ca/highwire/filestream/80721/field_highwire_adjunct_files/2/open-2013-0003-03-at.pdf)

Appendix 3: Percentage of contributions to global cardiovascular disease research from public and charitable organizations in Canada, by intervention. Data source: authors' calculation using data from Web of Science. Note: ACE = angiotensin-converting enzyme inhibitor, ICD = implantable cardioverter-defibrillator.

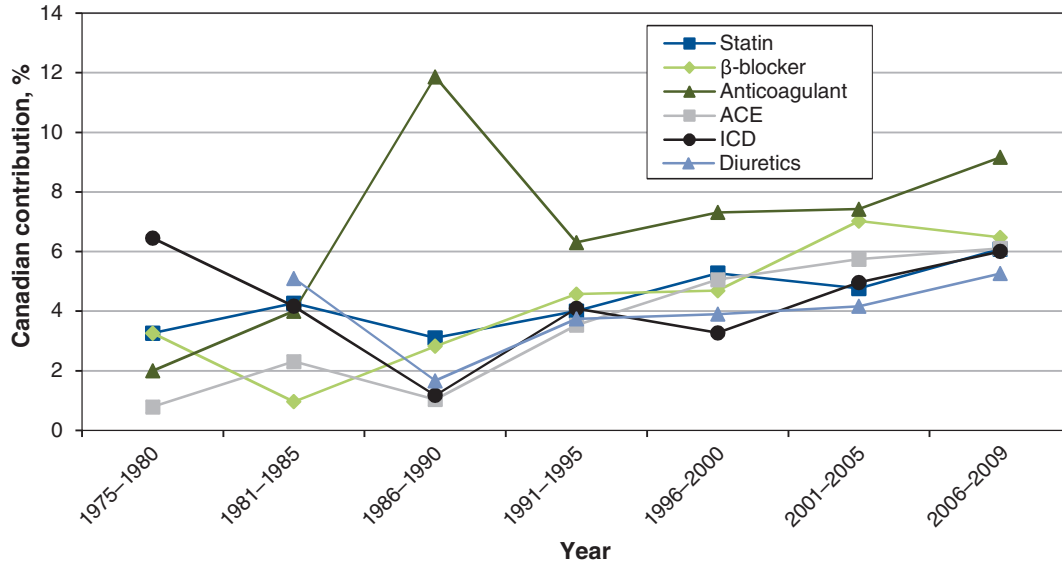

Supplement: open-2013-0003-03-at.pdf [file open-2013-0003-03-at.pdf]
